# Supplementary material for: Elastic Laminar Reorganization Occurs with Outward Diameter Expansion during Collateral Artery Growth and Requires Lysyl Oxidase for Stabilization
Source: MDPI journal article supplement (doi:10.3390/cells11010007), 2021-12-21
Supplement: s1 [file s1]

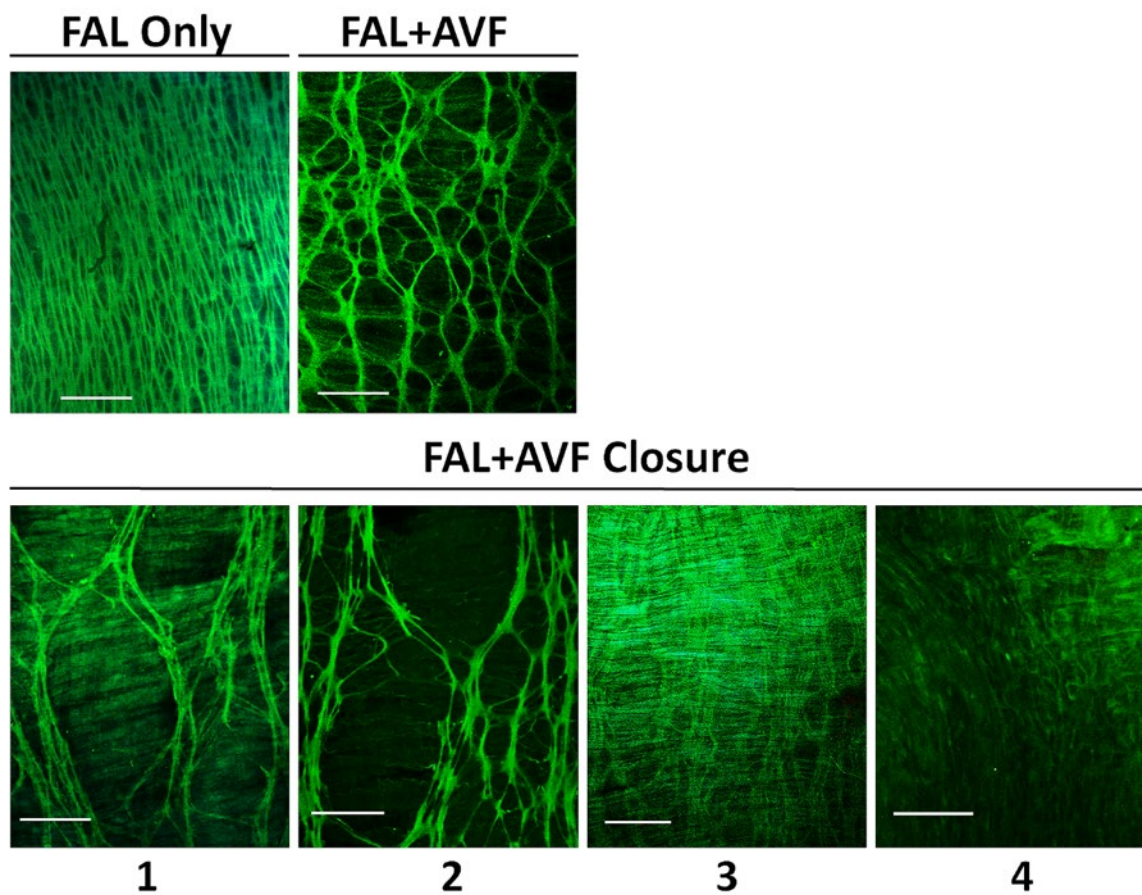

**Supplemental Figure S1.** Closure of AVF after 4 weeks. PFAs #1-3 demonstrated intact IEL structure but altered with irregular increased gap size between elastic fiber bundles and breakages in elastic fibers. For #4 no remaining IEL visible. Bar = 50  $\mu$ m. Images acquired with Olympus FV1000MPE utilizing 830 nm laser.
